# Supplementary material
Source: PubMed Central journal article supplement (PMC4134872)
Supplement: NIHMS586913-supplement-supplementary_data.pdf [file NIHMS586913-supplement-supplementary_data.pdf]

Supplemental Table 1. Organ involvement in six PTEN knockout mice examined.

| Mouse | BM | kidney | liver | spleen | bowel | brain | lung | heart | ovary | uterus | pancreas | trachea |
|-------|----|--------|-------|--------|-------|-------|------|-------|-------|--------|----------|---------|
| 471   | ▲  |        | ▲     | ▲      |       |       |      |       |       |        |          |         |
| 473   | ▲  |        | ▲     | ▲      |       |       |      |       |       |        |          |         |
| Pten2 | ▲  | ▲      | ▲     | ▲      | ▲     | ▲     | ▲    | ▲     | ▲     | ▲      | ▲        |         |
| 1855  | ▲  |        | ▲     | ▲      |       | ▲     |      | ▲     |       | ▲      |          | ▲       |
| M44   | ▲  |        |       | ▲      |       |       | ▲    |       |       |        |          |         |
| 893   | ▲  |        | ▲     | ▲      |       |       | ▲    | ▲     |       |        |          |         |
